# Supplementary material for: Diagnosing ozone–NO x –VOC–aerosol sensitivity and uncovering causes of urban–nonurban discrepancies in Shandong, China, using transformer-based estimations
Source: Copernicus journal article supplement (doi:10.5194/acp-24-4177-2024), 2024-04-08
Supplement: Supplementary file 1 [file acp-24-4177-2024-supplement.pdf]

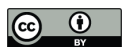

*Supplement of*

**Diagnosing ozone–NO<sub>x</sub>–VOC–aerosol sensitivity and uncovering causes of urban–nonurban discrepancies in Shandong, China, using transformer-based estimations**

**Chenliang Tao et al.**

*Correspondence to:* Yanbo Peng ([pengyanbo@mail.sdu.edu.cn](mailto:pengyanbo@mail.sdu.edu.cn)) and Qingzhu Zhang ([zqz@sdu.edu.cn](mailto:zqz@sdu.edu.cn))

The copyright of individual parts of the supplement might differ from the article licence.

## **S1. Variables Selected**

Satellite data have been extensively used to derive surface air pollutant concentration<sup>1,2</sup>. The daily tropospheric NO<sub>2</sub> vertical column densities (VCDs) and O<sub>3</sub> total VCDs with a horizontal resolution of  $5.5 \times 3.5$  km<sup>2</sup> were measured by TROPOMI. The daily AOD data and atmospheric properties with a 1 km resolution were obtained from MODIS Terra and Aqua combined multiangle implementation of atmospheric correction (MAIAC) land AOD product (MCD19A2)<sup>3</sup>. In addition, we used AOD estimates from the Modern-Era Retrospective Analysis for Research and Applications, version 2 (MERRA-2) as the supplement of MODIS for filling extensively missing values. The meteorological reanalysis data were obtained from the fifth generation ECMWF reanalysis for the global climate and weather (ERA5) hourly products<sup>4</sup>. Ancillary data related to human activity and geographical information were retrieved and rasterized, including daily dynamic industrial emissions, moonlight-adjusted nighttime lights (NTL) product, population density, road density, land use data, the shuttle radar topography mission digital elevation model (DEM), the MOD13Q1 vegetation index (VI) product, and the MOD11A1 land surface temperature (LST) product. Industrial emissions amount (unit: kg) contains three categories, i.e. sulfur dioxide (SO<sub>2</sub>), NO<sub>x</sub>, and particulate matter (PM), collected from SDEM. Geographic covariates directly related to pollution emissions, such as industrial emission, and road density were decomposed into magnitude-related data by using Gaussian convolution kernels to account for the impact of neighboring sources (Text S2).

## **S2. Data Extension of Emission Proxies**

The procedure of data extension follows from a previous study<sup>5</sup>, geographic covariates directly related to pollution emissions like industrial emission, road density, and population density were decomposed into magnitude-related data by using Gaussian convolution kernels to account for the impact of neighboring sources. In this study, after rasterizing all spatial data to match with the tarterd grid, the Gaussian convolution with the size of width (ranging from 1.5 to 31.5 km) was used to consider the impact of nearby sources. For the Gaussian convoluted values with various at each location, the maximum value () was assigned as the characteristic magnitude of the emission proxy

map for describing the influence of potential air pollution emission.

### S3. Spatiotemporal Proxies

Taking the space-time-variant into consideration, three Euclidean spherical coordinates (eqs 1 – 3) and three helix-shape trigonometric sequences (eqs 4 – 6) were calculated as following:<sup>6</sup>

$$s_1 = \cos\left(2\pi \frac{longitude}{360}\right) \cos\left(2\pi \frac{latitude}{180}\right) \quad (1)$$

$$s_2 = \cos\left(2\pi \frac{longitude}{360}\right) \sin\left(2\pi \frac{latitude}{180}\right) \quad (2)$$

$$s_3 = \sin\left(2\pi \frac{longitude}{360}\right) \quad (3)$$

$$\cos\_sea = \cos\left(2\pi \frac{month}{12}\right) \quad (4)$$

$$\sin\_sea = \sin\left(2\pi \frac{month}{12}\right) \quad (5)$$

$$\cos\_mon = \frac{month}{360} \quad (6)$$

### S4. Data Fusion and Gap filling

Due to the various data sources and types, we bilinearly interpolated predictor variables to the targeted grid with 500 m resolution to harmonize with other data. The daily Ozone (O<sub>3</sub>), fine particulate matter (PM<sub>2.5</sub>), and nitrogen dioxide (NO<sub>2</sub>) concentrations were assigned to their overlay cells by spatial aggregation.

The detection of trace gases information below-cloud was prevented by the shielding of ubiquitous clouds in optical remote sensing images, causing the existence of gaps in satellite productions. We utilize the efficient machine-learning model, called Light Gradient Boosting Machine (LightGBM)<sup>7</sup>, to fill the gaps in satellite data. LightGBM is designed to be distributed and efficient with the advantages of faster training speed and higher accuracy. Thus, it can impute a large dataset (1407 × 863 grids in the targeted resolution) with missing data in multiple variables using an iterative way. For each iteration, available daily satellite-based data are regarded as the observations, and the missing values are predicted by the LightGBM with meteorological reanalysis and geographical coordinates. The number of iterations corresponds to the number of satellite products with missing values. Here, the satellite-based production contains MOIDS AOD, TROPOMI NO<sub>2</sub> and O<sub>3</sub> column

density, normalized difference vegetation index (NDVI); enhanced vegetation index (EVI), and land surface temperature (LST). Applying the model of filling missing values, the predictions of all variables are reliable, with the average coefficient of determination ( $R^2$ ) values ranging from 0.87 to 0.99 in the validation set.

## **S5. The Detail of Air Transformer (AiT)**

In this study,  $V, T, H$  and  $W$  are configured to 57, 8, 5 and 5, respectively, according to the number of chosen variables and the empirical range of time and spatial. The data size remains unchanged  $V \times 8 \times 5 \times 5$  for the first AiT encoder blocks, while for the next 3 blocks, 2 blocks, and 1 block, the temporal dimensions and spatial window size are reduced by the convolutional embedded block, which includes convolution operation with  $2 \times 2 \times 2$  filter with the stride of  $2 \times 1 \times 1$ , and the number of variables' channels is 64, 96 and 128, resulting in data size of  $64 \times 4 \times 4 \times 4$ ,  $96 \times 2 \times 3 \times 3$  and  $128 \times 1 \times 2 \times 2$ . The data dimensionality is transformed through a linear layer in decoder blocks.

We train AiT via backpropagation using an AdamW optimizer with a learning strategy of warmup, a learning rate of 0.0005 and a batch size of 256, and apply early stopping on the validation loss using patience of 300 epochs. We combat overfitting by dropout within each layer of linear and self-attention. A GeLU activation function is applied throughout the network. The loss function of mean squared error was applied to the errors for the computation of gradients in the optimization. The model is coded and trained using the Pytorch library. Before the data is fed into the model for training, it is normalized over the entire dataset. The total dataset for training and testing has 262,656 instances.

For sensitivity analysis, we first simply applied the image and video recognition Transformers for the estimation and also achieved good prediction performance ( $R^2$  of 0.96 for  $O_3$  in Timesformer). However, the spatial distribution of estimation exhibits severe “reticular phenomenon” (Figure S2). We briefly analyze the reasons why original Transformer-based models fell into trouble in terms of pollutant maps. Firstly, these original Transformer-based image models are purely based on pixel units for self-attention computation. Air pollution estimation often involves various features (satellite, meteorological, and emission proxies, etc.)<sup>2,8-10</sup>, which is unlike image data with just

three channels (red, green, and blue). These models overly focus on the correlation between neighboring grids and lack extraction of deep features, resulting in a discontinuous distribution of estimation for our study. Secondly, they paid attention to the full domain of pixels and there were no overlaps between samples, so only the encoder part of Transformer was used. Air quality estimation could be troubled by the overlearning of neighborhood features and extensive data duplication of adjacent samples when existing deep learning models are directly applied. Summarizing the above factors, we believe that it is necessary to build upon a tradeoff between the spatial distribution of estimations and the performance of the model.

## S6. Multi-task Learning Strategy

It not only leverages large amounts of cross-task data but also benefits from a regularization effect that leads to more general representations to help adapt to estimating multiple pollutants simultaneously and efficiently,<sup>11</sup> and alleviating overfitting to a specific pollutant. As shown in the bottom right of Figure 1, the encoder and decoder blocks are shared across all predictions, while the last block is task-specific combining different estimations of PM<sub>2.5</sub>, O<sub>3</sub>, and NO<sub>2</sub>. The shared blocks can take advantage of the interrelationship between different air pollutants by learning the intrinsic features of data. The task-specific blocks can capture the relevant information needed for the single task from extracted potential features of Transformer blocks.

## S7. Method: Inferring Surface HCHO

### Column-to-surface Conversion Factor

The satellite-derived surface HCHO concentrations ( $S_g$ ) from Tropospheric Ozone Monitoring Instrument (TROPOMI) formaldehyde (HCHO) vertical columns density (VCD) by the simulated surface-to-column conversion factor method described in literatures<sup>12,13</sup>:

$$S_g = \frac{vV_M - V_M^{upper}}{V_M^{lower}} \times \frac{S_M}{V_M} \times V_g^- \quad (7)$$

where,  $S_g$  is the inferred surface level HCHO mixing ratio,  $S_M$  and  $V_M$  are the surface and tropospheric HCHO concentration,  $V_M^{lower}$  is the lower partial column,  $V_M^{upper}$  is the upper partial columns simulated by the CAM-Chem chemical transport model,  $V_g^-$  is the averaged tropospheric TROPOMI HCHO VCD within the WRF-model, and  $v$  represents the satellite-observed sub-

model-grid spatial variability calculated as:

$$v = \frac{V_g}{V_g} \quad (8)$$

where  $V_g$  is the tropospheric HCHO VCD in the TROPOMI grid. HCHO below the lower layer is considered to be well mixed in the vertical direction, and a large portion of HCHO (~70%) appears over the boundary layer, causing a nonhomogeneous distribution of upper partial columns. Therefore, in this study, the altitude where the HCHO partial column reaches the half maximum of its profile is regarded as the lower layer, following a previous study<sup>12</sup>.

### **ECMWF Atmospheric Composition Reanalysis 4 (EAC4)**

To derive the surface HCHO concentration, we used the European Centre for Medium-Range Weather Forecasts (ECMWF) Atmospheric Composition Reanalysis 4 (EAC4) at 0.75×0.75 horizontal resolution simulation with 25 vertical levels.<sup>14</sup> Reanalysis combines model data with observations from across the world into a globally complete and consistent dataset using a model of the atmosphere based on the laws of physics and chemistry. The monthly averaged field of EAC4 was used in our study.

### **S8. Cross Validation**

The performance of our AiT model is evaluated through two cross-validation (CV) methods: out-of-sample 10-fold CV and out-of-site 10-fold CV. The out-of-sample CV, where all samples are randomly divided into 10 folds, saving one-fold for testing, is widely used for comparing measurements with the predictions of the out-of-bag sample. In addition, the generalization capability of spatial prediction at the location without monitors is evaluated by out-of-site CV, which randomly divides all sites into 10 subsets and then trains the model using nine subsets and tests the model on the remaining subset.

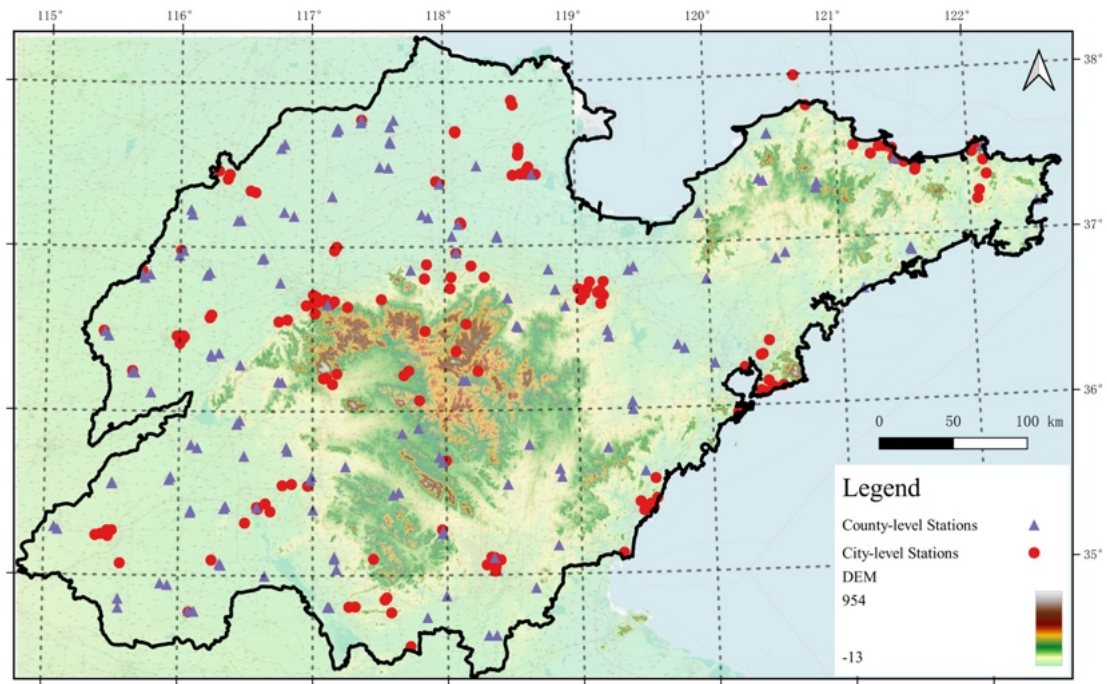

**Figure S1.** Map of study domain and location of monitoring stations. Purple triangles show the county-level air quality monitoring stations from SDEM, and red markers show the city-level air quality monitoring stations from CNEMC. The base map is the overlay of satellite images (© Google Maps 2023) and Digital Elevation Model (DEM) data.

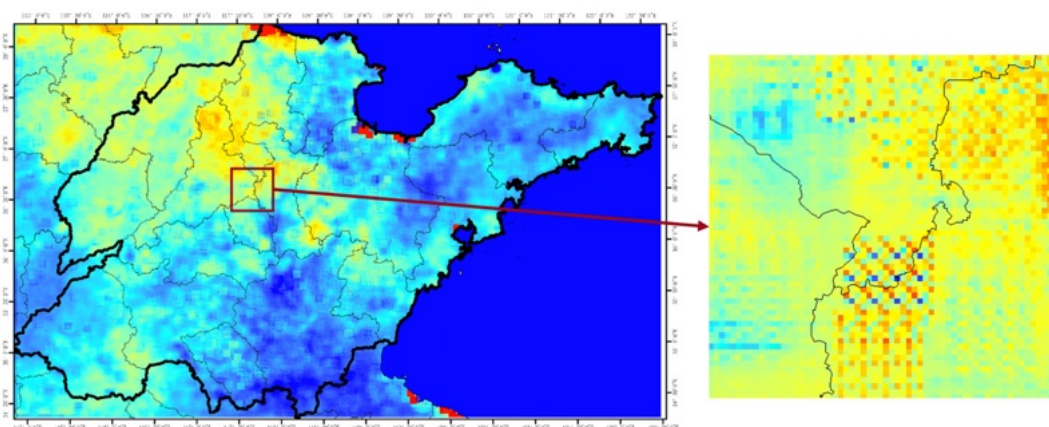

**Figure S2.** The estimated  $O_3$  concentration on May 12, 2018, in Shandong, China using Timesformer (left) and also the zoomed-in map in region-scale distribution (right). The blue area represents the ocean.

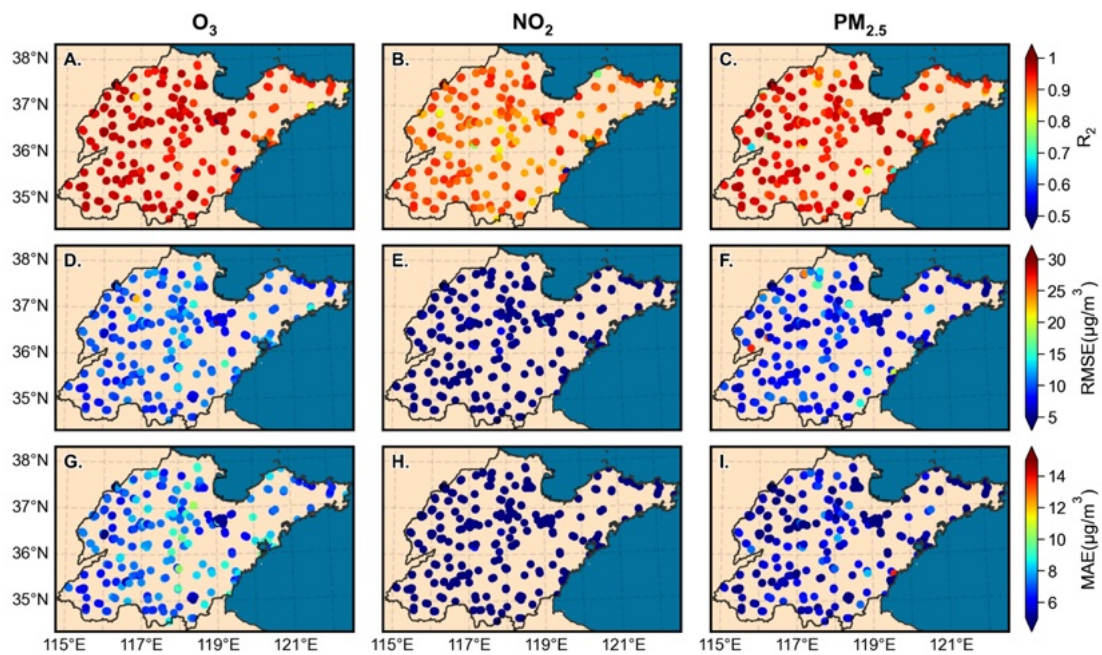

**Figure S3.** Out-of-sample cross-validation of daily surface  $O_3$ ,  $NO_2$  and  $O_3$  estimates at each monitoring site.

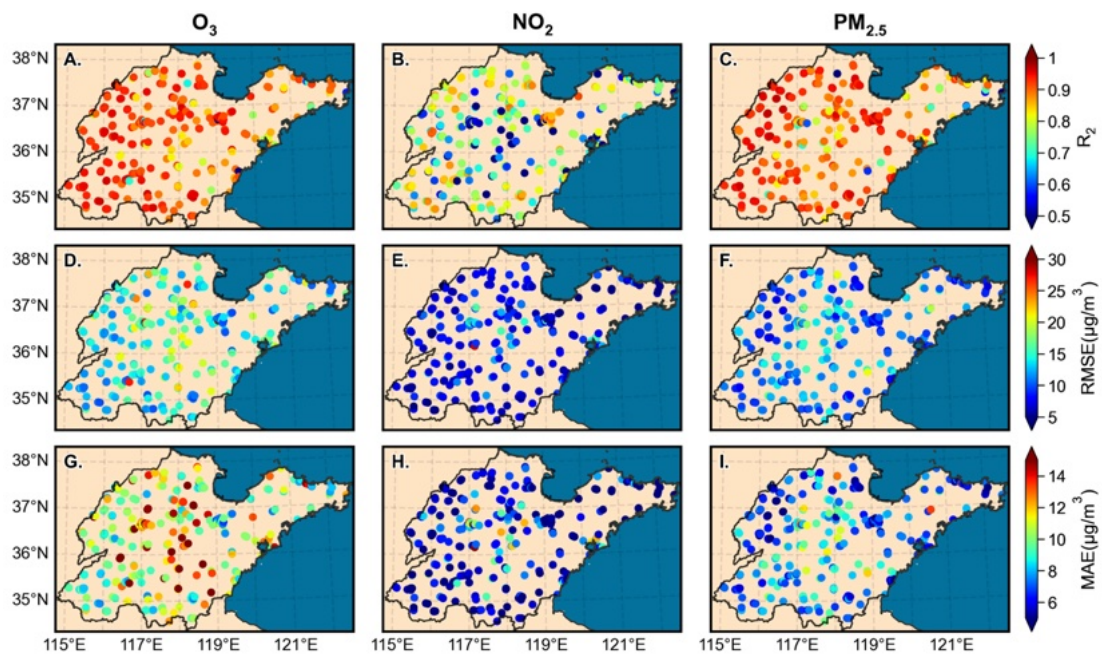

**Figure S4.** Out-of-site cross-validation of daily surface  $O_3$ ,  $NO_2$  and  $O_3$  estimates at each monitoring site.

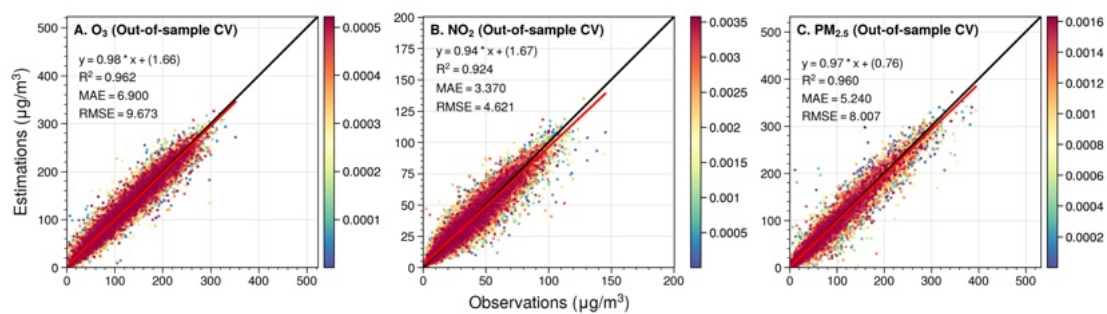

**Figure S5.** Out-of-sample cross-validation (A-C) of daily ground-level O<sub>3</sub>, NO<sub>2</sub> and PM<sub>2.5</sub> concentration in the validation set based on the AiT model trained by monitoring data of CNEMC.

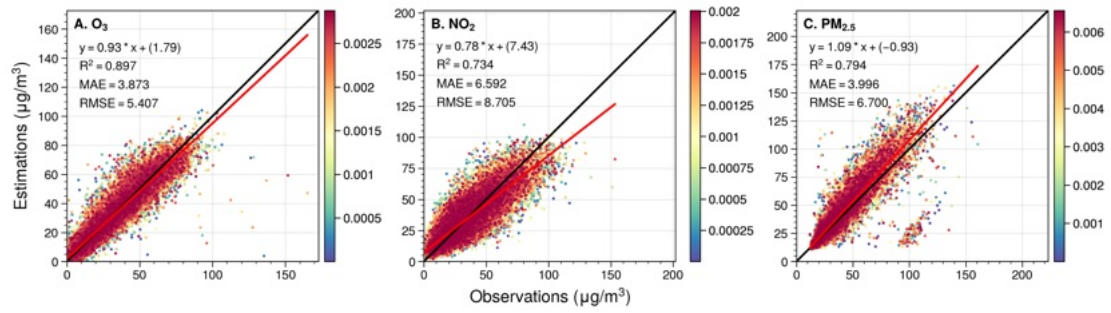

**Figure S6.** Validation for daily ground-level O<sub>3</sub>, NO<sub>2</sub>, and PM<sub>2.5</sub> concentration in the SDEM dataset based on the AiT model trained by monitoring data of CNEMC.

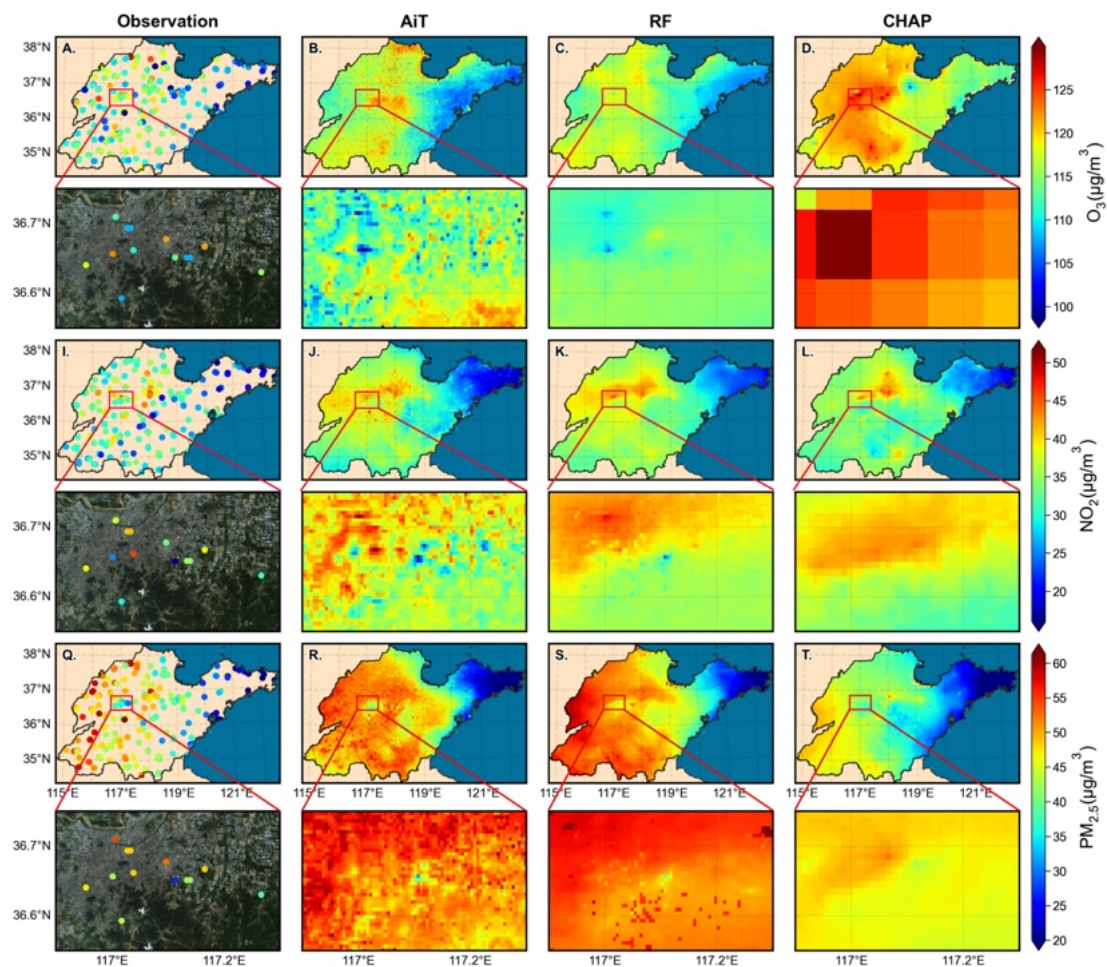

**Figure S7.** Spatial distribution of the annual mean (A-D)  $O_3$ , (I-L)  $NO_2$  and (Q-T)  $PM_{2.5}$  concentrations from observations, Air Transformer (AiT), Random Forest (RF) and ChinaHighAirPollutants (CHAP), respectively, in 2020. The region enclosed by the red rectangular box in (A-T) corresponds to the zoomed-in maps of the satellite (© Tianditu: [www.tianditu.gov.cn](http://www.tianditu.gov.cn)) and pollutant concentrations at a city scale for the capital city of Shandong Province, Jinan.

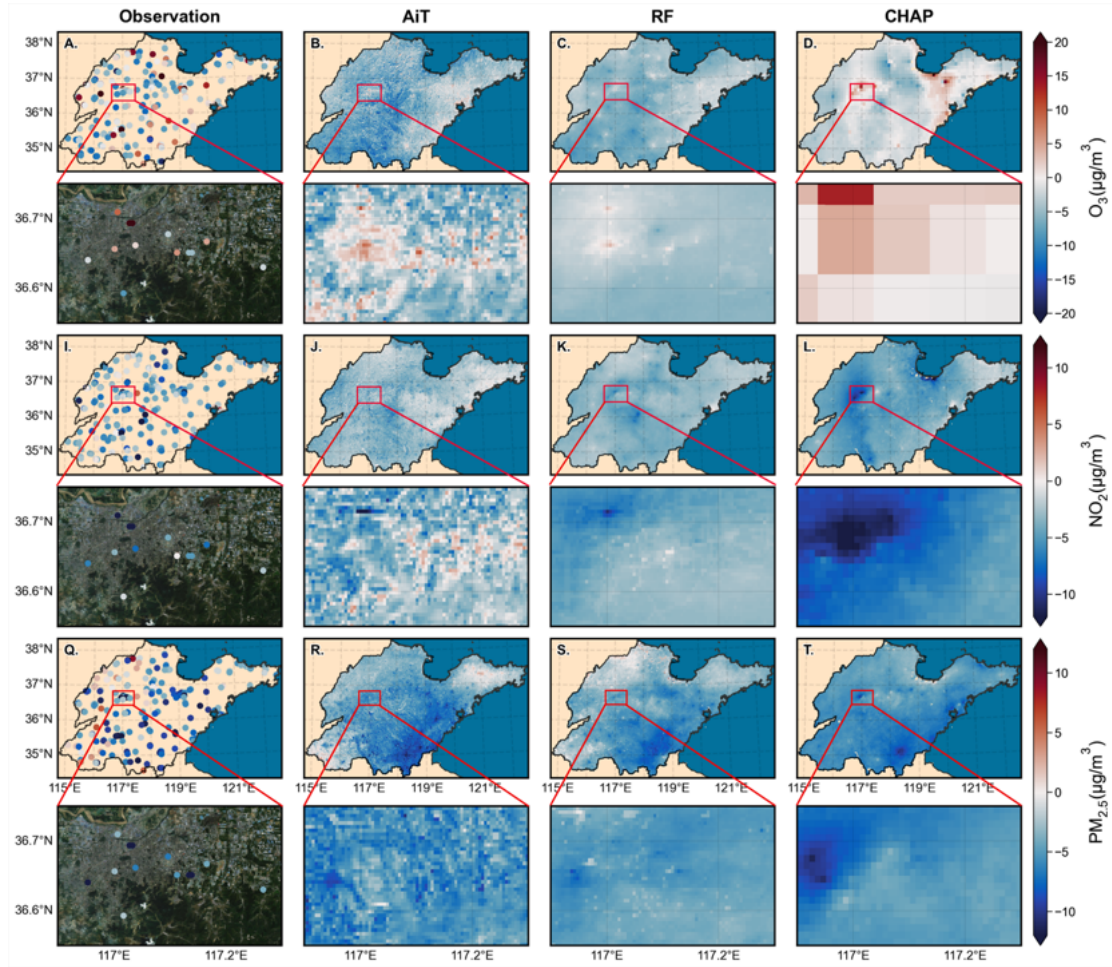

**Figure S8.** Spatial distribution of annual mean disparities for (A-D) O<sub>3</sub>, (I-L) NO<sub>2</sub> and (Q-T) PM<sub>2.5</sub> concentrations from observations, Air Transformer (AiT), Random Forest (RF) and ChinaHighAirPollutants (CHAP), respectively, during 2019-2020. The region enclosed by the red rectangular box in (A-T) corresponds to the zoomed-in maps of the satellite (© Tianditu: [www.tianditu.gov.cn](http://www.tianditu.gov.cn)) and pollutant concentrations at a city scale for the capital city of Shandong Province, Jinan.

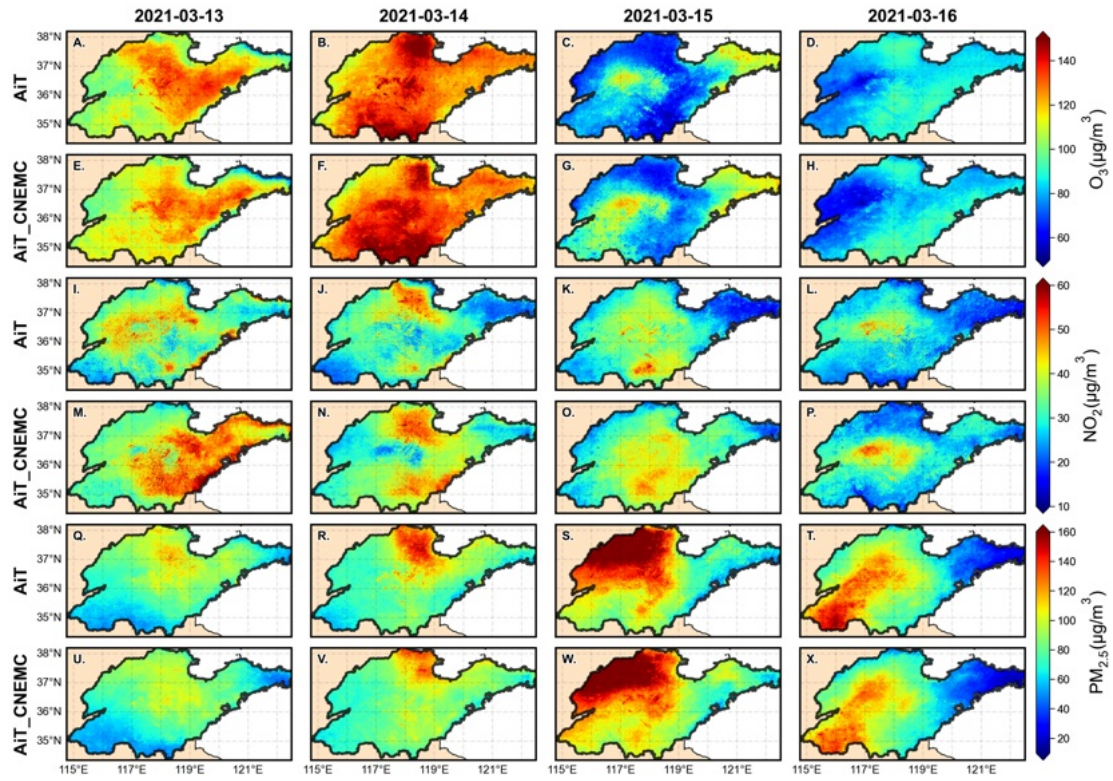

**Figure S9.** Comparison of spatial distribution between estimations from AiT trained with all data and AiT with CNEMC data during the dust storm.

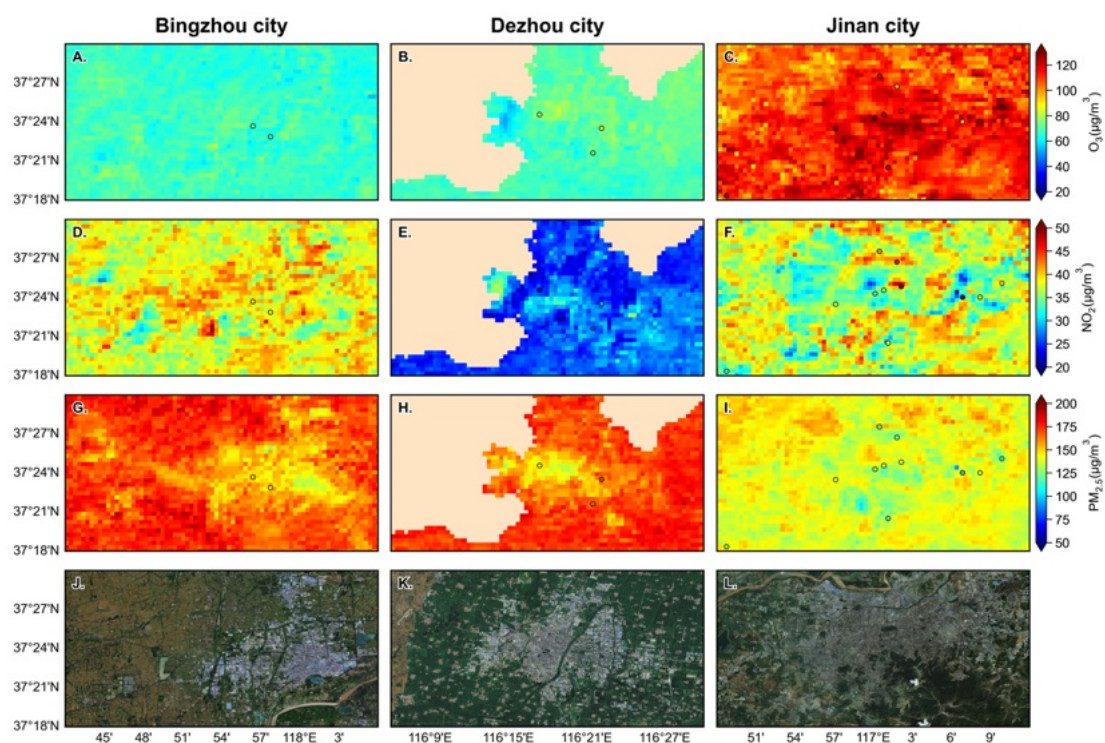

**Figure S10.** The spatial distribution of ground-level  $O_3$  (A-C),  $NO_2$  (D-F), and  $PM_{2.5}$  (G-I) from AiT and monitoring stations in three cities experiencing diverse dust storm pollution on 15 March 2021 in Shandong, China. J-L represents the satellite maps of these cities (© Tianditu: [www.tianditu.gov.cn](http://www.tianditu.gov.cn)).

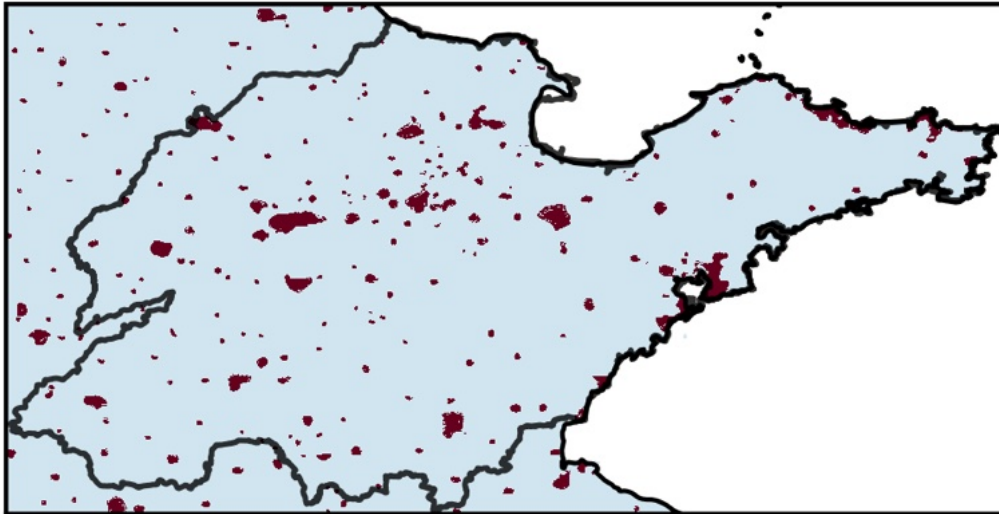

**Figure S11.** Urban extents (red) in Shandong province, China in 2019.

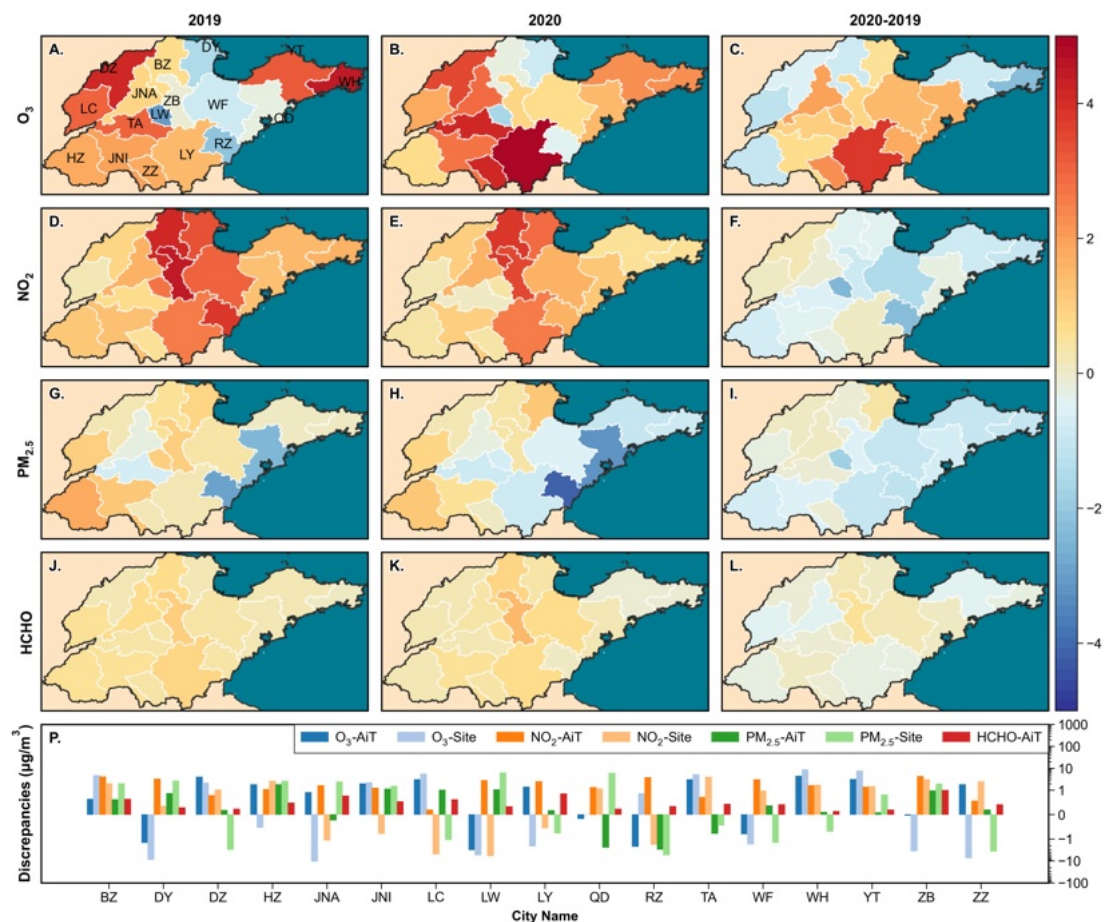

**Figure S12.** The urban-nonurban disparities of  $O_3$ ,  $NO_2$ ,  $PM_{2.5}$  and  $HCHO$  calculated by AiT across cities with administrative divisions in Shandong, China during summer in 2019 (A, D, G) and 2020 (B, E, H), and the changes of differences between 2019 and 2020 (C, F, I).

195

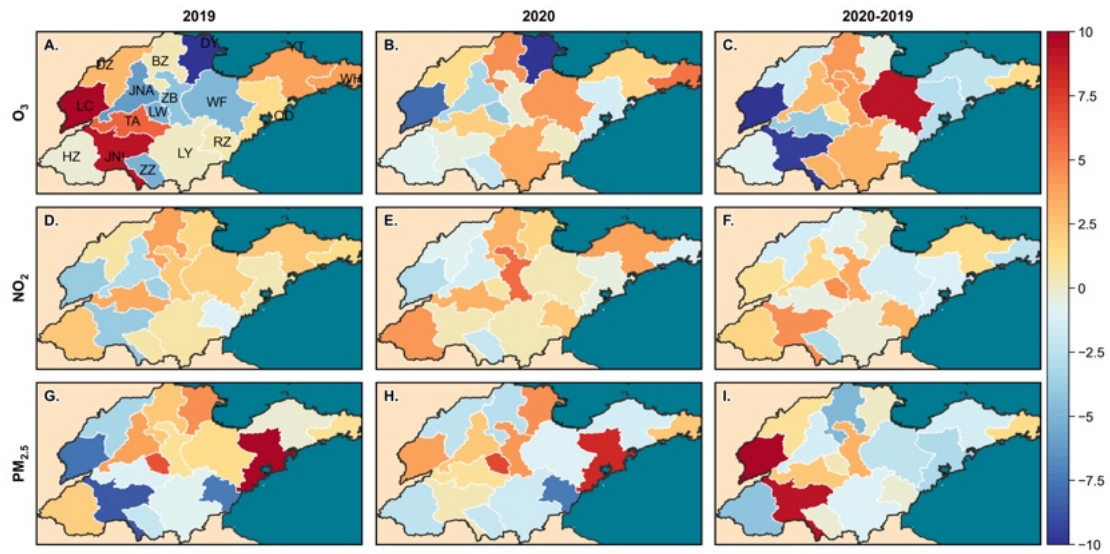

196

197 **Figure S13.** The urban-nonurban disparities of  $O_3$ ,  $NO_2$ , and  $PM_{2.5}$  were calculated by  
198 monitoring station data across cities in Shandong, China in 2019 (A, D, G) and 2020  
199 (B, E, H), and the changes of differences between 2019 and 2020 (C, F, I).

200

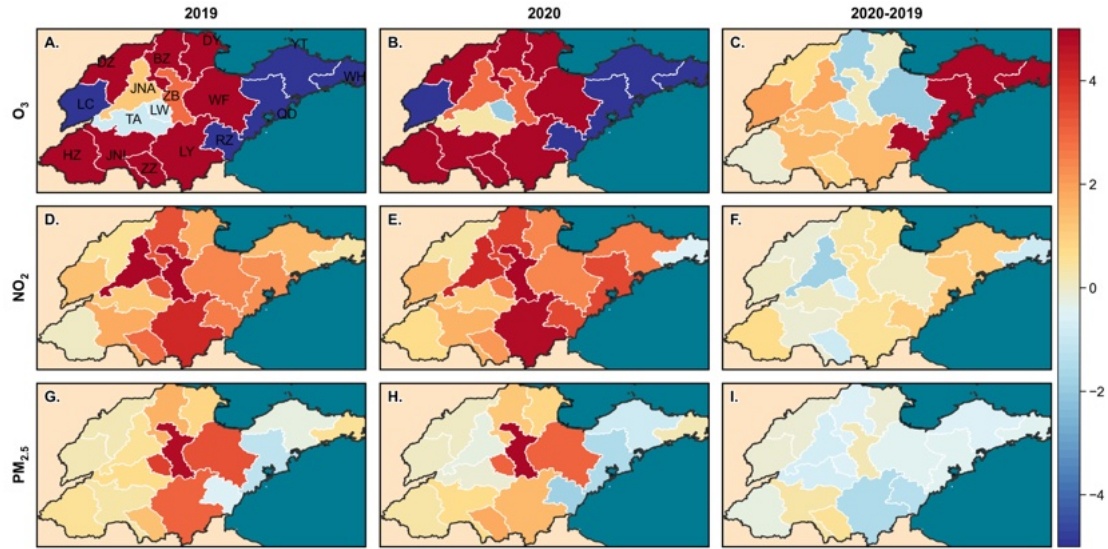

**Figure S14.** The urban-nonurban disparities of  $O_3$ ,  $NO_2$ , and  $PM_{2.5}$  calculated by CHAP across cities in Shandong, China in 2019 (A, D, G) and 2020 (B, E, H), and the changes of differences between 2019 and 2020 (C, F, I).

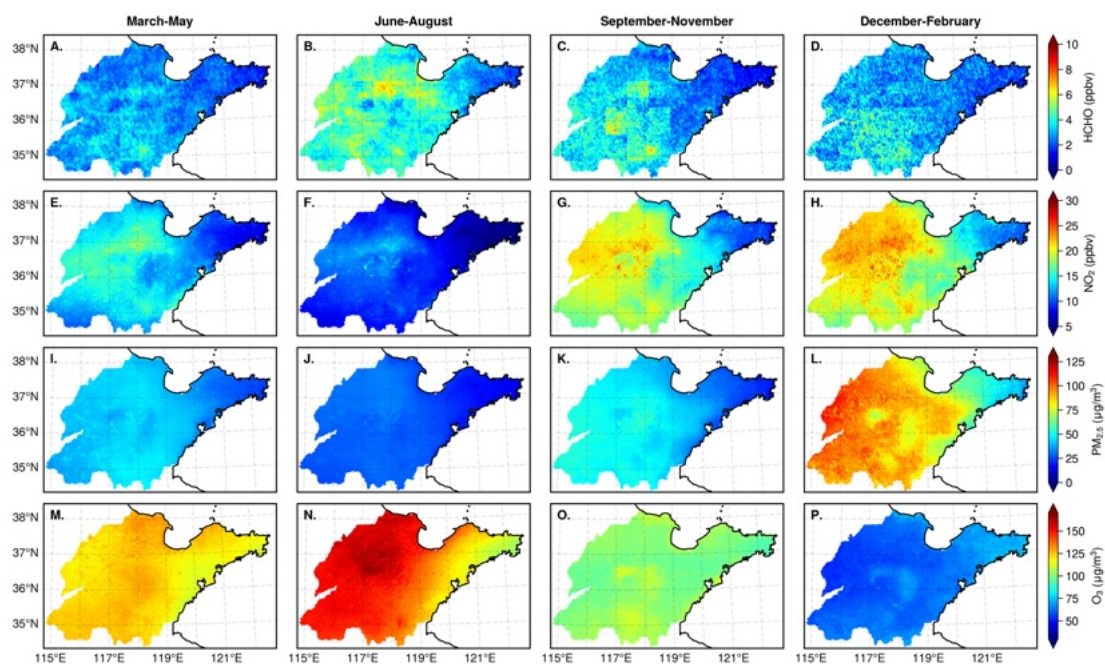

**Figure S15.** The seasonal changes of surface HCHO mixing ratio inferred from TROPOMI and EAC4 (A-D), and surface NO<sub>2</sub> (E-D), PM<sub>2.5</sub> (I-L) and O<sub>3</sub> (M-P) derived from Air Transformer across Shandong, China, in 2010 and 2020.

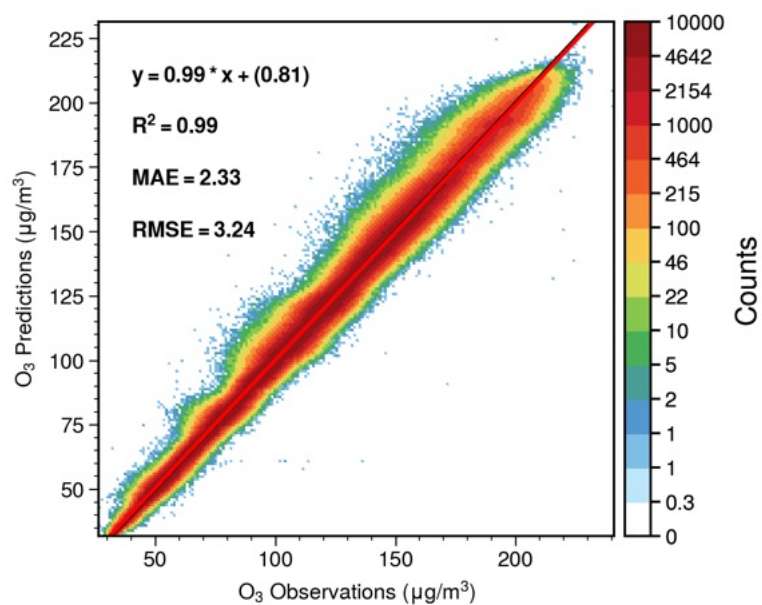

**Figure S16.** Results of 10-fold cross-validation in validation dataset based on XGBoost for modeling the nonlinear response of monthly O<sub>3</sub> variations to meteorology and chemical indicators from 2019 to 2020.

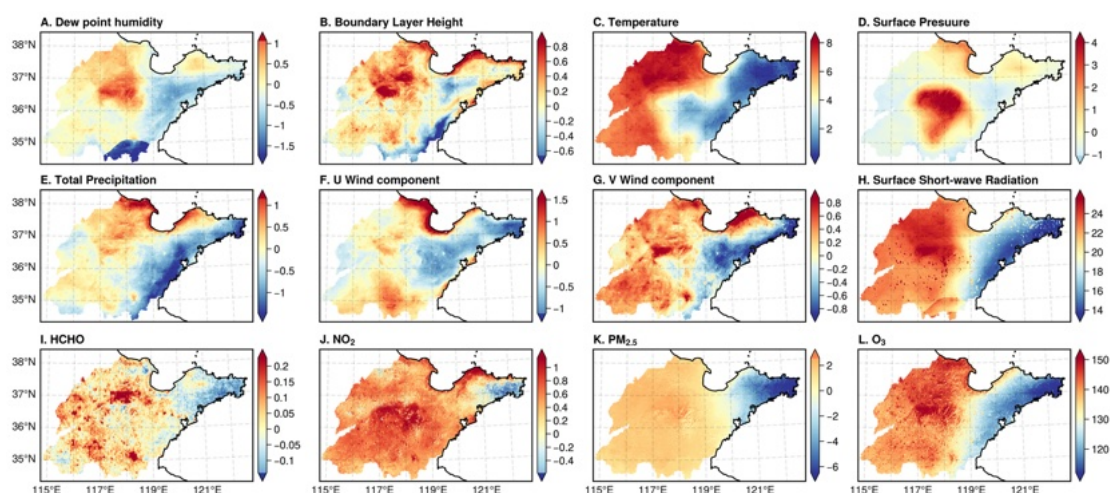

**Figure S17.** The geographical distribution of the averaged SHAP values for the important driving factors of O<sub>3</sub> production (A-K) in XGBoost model, and O<sub>3</sub> concentration (L) from May to October across Shandong, China in 2019 and 2020. The above color demonstrates how different variables each contribute to pushing the model output away from the base value (the average model output over the training dataset) towards the actual model output. Variables pushing the O<sub>3</sub> higher are shown in red, indicating they promote O<sub>3</sub> formation. In contrast, variables pushing the estimations lower are in blue, revealing they inhibit O<sub>3</sub> formation.

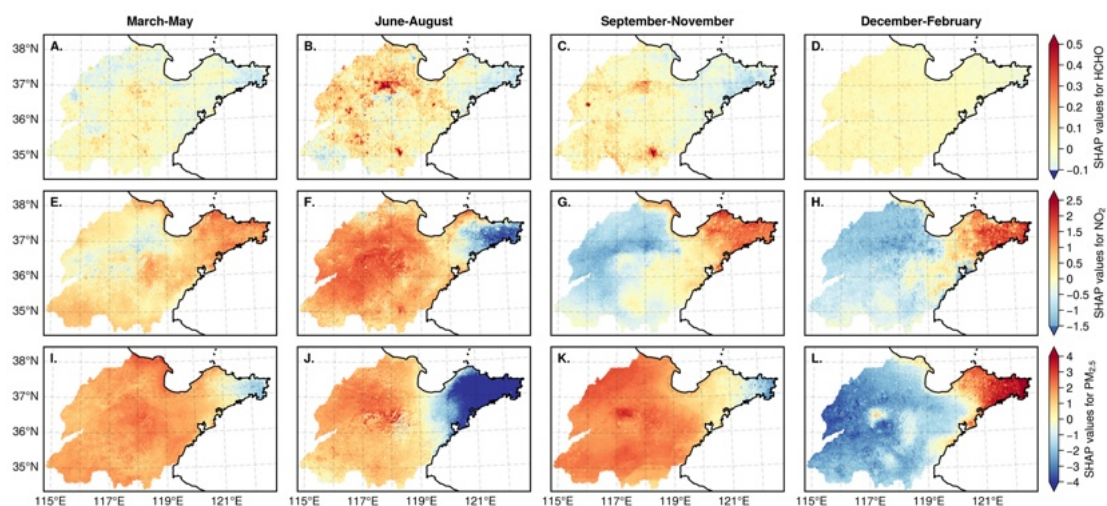

**Figure S18.** The seasonal changes of SHAP values in HCHO (A-D), NO<sub>2</sub> (E-H) and PM<sub>2.5</sub> (I-L) for O<sub>3</sub> formation across Shandong, China in 2019 and 2020.

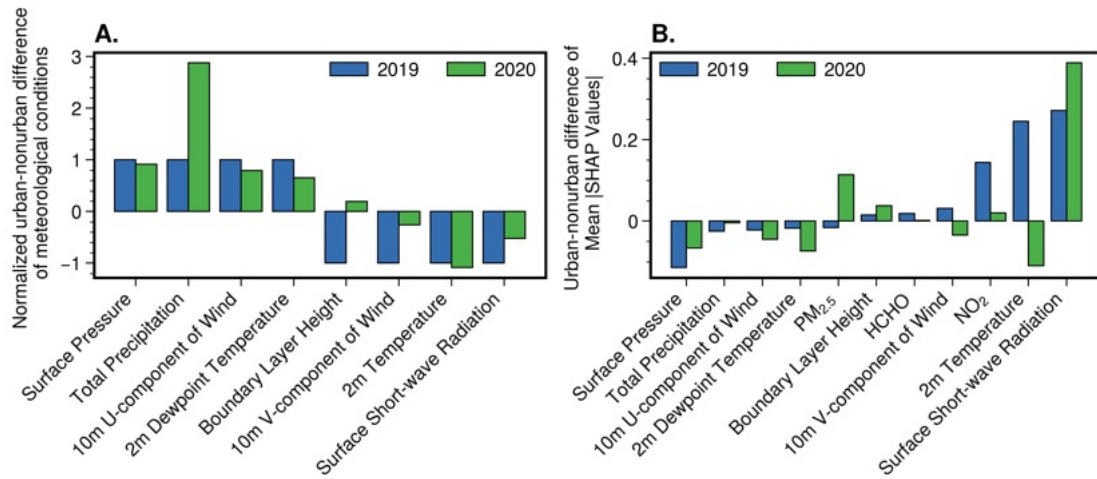

**Figure S19.** Comparison of urban-nonurban disparities in meteorological conditions (A), and mean absolute SHAP values (B) between 2019 and 2020 across Shandong, China during the COVID period.

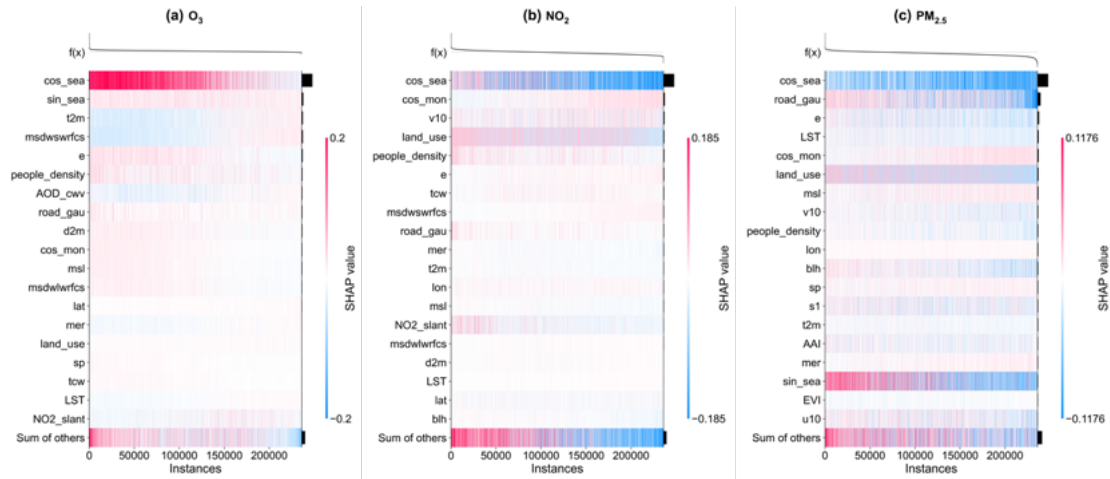

**Figure S20.** Contribution of each covariate to the near-surface O<sub>3</sub> (a), NO<sub>2</sub> (b), and PM<sub>2.5</sub> (c) concentration quantified with the Shapley Additive explanations (SHAP) method in the training dataset. The estimations of the model are shown above the heatmap matrix and the global importance of each model input is shown as a bar plot on the right side of the plot. The top fifteen variables of global importance are listed in order from top to bottom. The abbreviation of “people\_density”, “road\_gau”, and “land\_use” represents the people density, road density and land use data, respectively. Another full form of the abbreviation can be found in Text S2 and Table S1.

**Table S1.** Summary of the dataset used in Air Transformer from multiple sources\*

| Data category                | Data name                                                       | Spatial resolution          | Temporal resolution | Data source                                                                                                                                                                         |
|------------------------------|-----------------------------------------------------------------|-----------------------------|---------------------|-------------------------------------------------------------------------------------------------------------------------------------------------------------------------------------|
| Ground observation           | O <sub>3</sub> 、NO <sub>2</sub> 、PM <sub>2.5</sub> measurements | Point                       | Hourly              | <a href="http://www.sdem.org.cn">http://www.sdem.org.cn</a><br><a href="http://www.cnemc.cn">http://www.cnemc.cn</a>                                                                |
| Satellite data               | TROPOMI O <sub>3</sub> , NO <sub>2</sub> <sup>[1]</sup>         | 5.5 × 3.5 km <sup>[2]</sup> | Daily               | <a href="https://scihub.copernicus.eu">https://scihub.copernicus.eu</a>                                                                                                             |
|                              | MAIAC AOD <sup>[3]</sup>                                        | 1 × 1 km                    | Daily               | <a href="https://lpdaac.usgs.gov/products/mcd19a2v006/">https://lpdaac.usgs.gov/products/mcd19a2v006/</a>                                                                           |
| Meteorological fields        | ERA5 <sup>[4]</sup>                                             | 0.25° × 0.25°               | Hourly              | <a href="https://cds.climate.copernicus.eu">https://cds.climate.copernicus.eu</a>                                                                                                   |
| Ancillary data               | Industry emission                                               | Point                       | Hourly              | <a href="http://www.sdem.org.cn">http://www.sdem.org.cn</a>                                                                                                                         |
|                              | Land use                                                        | 30 × 30 m                   | -                   | <a href="http://www.globallandcover.com">http://www.globallandcover.com</a>                                                                                                         |
|                              | People density                                                  | 100m                        | -                   | <a href="https://hub.worldpop.org">https://hub.worldpop.org</a>                                                                                                                     |
|                              | Road density                                                    | 0.5 × 0.5 km                | -                   | <a href="https://www.openstreetmap.org">https://www.openstreetmap.org</a>                                                                                                           |
|                              | Digital elevation model (DEM)                                   | 0.5 × 0.5 km                | -                   | <a href="https://www.resdc.cn">https://www.resdc.cn</a>                                                                                                                             |
|                              | MODIS vegetation index <sup>[5]</sup>                           | 0.25 × 0.25 km              | 16-daily            | <a href="https://lpdaac.usgs.gov/products/mod13q1v061/">https://lpdaac.usgs.gov/products/mod13q1v061/</a>                                                                           |
|                              | Nighttime lights (NTL)                                          | 0.5 × 0.5 km                | Daily               | <a href="https://ladsweb.modaps.eosdis.nasa.gov/missions-and-measurements/products/VNP46A2/">https://ladsweb.modaps.eosdis.nasa.gov/missions-and-measurements/products/VNP46A2/</a> |
|                              | Land surface temperature (LST)                                  | 1 × 1 km                    | Daily               | <a href="https://e4ftl01.cr.usgs.gov">https://e4ftl01.cr.usgs.gov</a>                                                                                                               |
|                              | MERRA-2 AOD reanalysis <sup>[6]</sup>                           | 0.625° × 0.5°               | 3-hourly            | <a href="https://disc.gsfc.nasa.gov/datasets/M2I3NXGAS_5.12.4/summary">https://disc.gsfc.nasa.gov/datasets/M2I3NXGAS_5.12.4/summary</a>                                             |
| Spatial-temporal information | Euclidean spherical coordinates                                 | -                           | -                   | -                                                                                                                                                                                   |
|                              | Temporal trend <sup>[7]</sup>                                   | -                           | -                   | -                                                                                                                                                                                   |

\* The dataset covers the Shandong province of China from May 1, 2018 to July 1, 2021.

<sup>[1]</sup> TROPOMI satellite data contains: Tropospheric NO<sub>2</sub> column density (NO<sub>2</sub>); Total O<sub>3</sub> column density (O<sub>3</sub>); NO<sub>2</sub> slant columns density (NO<sub>2\_slant</sub>); Absorbing aerosol index (AAI); cloud fraction. The Level-2 data from TROPOMI were filtered based on quality assurance values (>0.5).

<sup>[2]</sup> 7.5 × 3.5 km from 30. May 2018 to 6. August 2019.

249 <sup>[3]</sup> MAIAC AOD data including Aerosol Optical Depth (AOD) and column water vapor over land and clouds (AOD\_cwv). The AOD was calculated by averaging the  
250 AOD at 0.47  $\mu\text{m}$  and 0.55  $\mu\text{m}$ . MAIAC AOD has better accuracy in the brighter areas<sup>15</sup> compared with AOD products generated from the Deep Blue<sup>16</sup> or Dark Target  
251 algorithms<sup>17</sup>.

252 <sup>[4]</sup> ERA5 hourly data on single levels (reanalysis). It contains 18 variables: 10 meter U wind component (u10), 10 meter V wind component (v10), 2 meter dewpoint  
253 temperature (d2m); 2 meter temperature (t2m); Boundary layer height (blh); Evaporation (e); Total precipitation (tp); Surface pressure (sp); Boundary layer dissipation;  
254 Cloud base height; Low vegetation cover; Forecast albedo; Instantaneous large-scale surface precipitation fraction; Medium cloud cover; Mean evaporation rate (mer);  
255 Mean surface downward long-wave radiation flux, clear sky (msdwlwrfcs); Mean surface downward short-wave radiation flux, clear sky (msdswrfcs); Mean sea level  
256 pressure (msl); Total columns ozone; Total columns water (tcw).

257 <sup>[5]</sup> MODIS vegetation index contains: Normalized Difference Vegetation Index (NDVI); Enhanced Vegetation Index (EVI).

258 <sup>[6]</sup> MERRA-2 AOD reanalysis contains: Aerosol Optical Depth Analysis, Aerosol Optical Depth Analysis Increment.

259 <sup>[7]</sup> Temporal trends contain: Helix-shape trigonometric month sequence; Julian day; Year; Month. One-hot encoding was used to process categorical variables.

260

**Table S2.** The performances of AiT in estimating multiple targeted pollutants as well as single targeted pollutants. All four models was trained using the same input dataset, but different targets (The targets of AiT are O<sub>3</sub>, NO<sub>2</sub>, and PM<sub>2.5</sub>. The target of AiT\_O<sub>3</sub>, AiT\_NO<sub>2</sub>, AiT\_PM<sub>2.5</sub> is O<sub>3</sub>, NO<sub>2</sub> and PM<sub>2.5</sub>, respectively).

| Model                     | AiT            |                 |                   | AiT_O <sub>3</sub> | AiT_NO <sub>2</sub> | AiT_PM <sub>2.5</sub> |
|---------------------------|----------------|-----------------|-------------------|--------------------|---------------------|-----------------------|
|                           | O <sub>3</sub> | NO <sub>2</sub> | PM <sub>2.5</sub> | O <sub>3</sub>     | NO <sub>2</sub>     | PM <sub>2.5</sub>     |
| R <sup>2</sup>            | 0.96           | 0.92            | 0.90              | 0.97               | 0.92                | 0.90                  |
| RMSE (µg/m <sup>3</sup> ) | 9.96           | 4.72            | 11.99             | 9.27               | 4.75                | 12.57                 |
| MAE (µg/m <sup>3</sup> )  | 7.06           | 3.48            | 5.38              | 6.35               | 3.46                | 6.14                  |

**Table S3.** Comparison of model performance with previous studies.

| Model    | Spatial resolution | Cross-validation |                           | Pollutant         | Literature                       |
|----------|--------------------|------------------|---------------------------|-------------------|----------------------------------|
|          |                    | R <sup>2</sup>   | RMSE (μg/m <sup>3</sup> ) |                   |                                  |
| RF       | 0.05°              | 0.87             | 13.03                     | O <sub>3</sub>    | Zhu et al., 2022 <sup>18</sup>   |
| STET     | 0.1°               | 0.87             | 17.1                      | O <sub>3</sub>    | Wei et al., 2022 <sup>19</sup>   |
| LSTM     | 0.1°               | 0.94             | 10.64                     | O <sub>3</sub>    | Wang et al., 2022 <sup>20</sup>  |
| DP       | 0.003°             | 0.94             | 11.29                     | O <sub>3</sub>    | Li et al., 2022 <sup>10</sup>    |
| LightGBM | 0.05°              | 0.91             | 14.14                     | O <sub>3</sub>    | Wang et al., 2021 <sup>2</sup>   |
| XGBoost  | 0.05°              | 0.83             | 7.58                      | NO <sub>2</sub>   | Liu, 2021 <sup>21</sup>          |
| LightGBM | 0.05°              | 0.83             | 6.62                      | NO <sub>2</sub>   | Wang et al., 2021 <sup>2</sup>   |
| GTWR-SK  | 0.025°             | 0.84             | 6.70                      | NO <sub>2</sub>   | Wu et al., 2021 <sup>22</sup>    |
| FSDN     | 0.01°              | 0.82             | 8.80                      | NO <sub>2</sub>   | Li & Wu, 2021 <sup>23</sup>      |
| SWDF     | 0.01°              | 0.93             | 4.89                      | NO <sub>2</sub>   | Wei et al., 2022 <sup>24</sup>   |
| DP       | 0.04°              | 0.88             | 11.27                     | PM <sub>2.5</sub> | Song et al., 2022 <sup>1</sup>   |
| DEML     | 0.01°              | 0.87             | 5.38                      | PM <sub>2.5</sub> | Yu et al., 2022 <sup>25</sup>    |
| RF       | 0.1°               | 0.83             | 13.9–22.1                 | PM <sub>2.5</sub> | Geng et al., 2021 <sup>26</sup>  |
| STET     | 0.01°              | 0.89             | 10.33                     | PM <sub>2.5</sub> | Wei et al., 2020 <sup>9</sup>    |
| RF       | 0.01°              | 0.88             | 15.73                     | PM <sub>2.5</sub> | Huang et al., 2021 <sup>27</sup> |
| RF*      | 0.005°             | 0.90             | 15.5                      | O <sub>3</sub>    | This study                       |
|          |                    | 0.82             | 7.2                       | NO <sub>2</sub>   |                                  |
|          |                    | 0.92             | 10.72                     | PM <sub>2.5</sub> |                                  |
| AiT      | 0.005°             | <b>0.96</b>      | <b>10.11</b>              | O <sub>3</sub>    | This study                       |
|          |                    | <b>0.92</b>      | <b>4.82</b>               | NO <sub>2</sub>   |                                  |
|          |                    | <b>0.95</b>      | <b>8.54</b>               | PM <sub>2.5</sub> |                                  |

STET: Space-time extremely randomized trees; LSTM: Long short-term memory network; DP: deep forest; semi-SILDLM: tree-based ensemble deep learning model; LightGBM: Light gradient boosting machine; XGBoost: Extreme gradient boosting; GTWR-SK: Geographically and temporal weighted regression with spatiotemporal kriging; SFDN: Full residual deep networks; SWDF: Spatiotemporally weight deep forest; DEML: deep ensemble machine learning; RF: random forest; AiT: Air Transformer.

\*: While training RF with variables involving neighboring grids is necessary, ML models are limited to accepting only one-dimensional data. Flattening four-dimensional data ( $X \in R^{57 \times 8 \times 5 \times 5}$ ) causes a significant increase in the number of features, which results in a reduction in model performance. Thus, to ensure optimal performance, only variables in situ were employed to train RF.

**Table S4.** The average concentration of four pollutants across urban and non-urban areas in 2019 and 2020.

| Year                    | Type     | O <sub>3</sub> | NO <sub>2</sub> | PM <sub>2.5</sub> | HCHO  |
|-------------------------|----------|----------------|-----------------|-------------------|-------|
| 2019                    | Nonurban | 141.1          | 24.7            | 33.3              | 3.5   |
|                         | Urban    | 141.1          | 26.3            | 32.6              | 4.2   |
| 2020                    | Nonurban | 129.2          | 24.2            | 30.8              | 3.3   |
|                         | Urban    | 130.4          | 25.4            | 29.5              | 4.0   |
| Relative<br>Changes (%) | Nonurban | -8.43          | -2.02           | -7.51             | -5.71 |
|                         | Urban    | -7.58          | -3.42           | -9.51             | -4.76 |

**Table S5.** The number of monitoring stations across urban and non-urban areas. (YT: Yantai, BZ: Binzhou, DY: Dongying, WH: Weihai, DZ: Dezhou, JNA: Jinan, QD: Qingdao, WF: Weifang, ZB: Zibo, LC: Liaocheng, LW: Laiwu, TA: Taian, LY: Linyi, RZ: Rizhao, JNI: Jinan, HZ: Heze, ZZ: Zaozhuang)

| City Name | BZ | DY | DZ | HZ | JNA | JNI | LC | LW | LY |
|-----------|----|----|----|----|-----|-----|----|----|----|
| Non-urban | 9  | 2  | 10 | 6  | 2   | 6   | 7  | 2  | 8  |
| Urban     | 7  | 11 | 14 | 14 | 17  | 15  | 15 | 1  | 14 |
| City Name | QD | RZ | TA | WF | WH  | YT  | ZB | ZZ |    |
| Non-urban | 1  | 5  | 4  | 9  | 3   | 3   | 10 | 2  |    |
| Urban     | 11 | 5  | 7  | 15 | 7   | 18  | 6  | 8  |    |

## References

- (1) Song, Z.; Chen, B.; Zhang, P.; Guan, X.; Wang, X.; Ge, J.; Hu, X.; Zhang, X.; Wang, Y. High Temporal and Spatial Resolution PM<sub>2.5</sub> Dataset Acquisition and Pollution Assessment Based on FY-4A TOAR Data and Deep Forest Model in China. *Atmospheric Research* **2022**, *274*, 106199. <https://doi.org/10.1016/j.atmosres.2022.106199>.
- (2) Wang, Y.; Yuan, Q.; Li, T.; Zhu, L.; Zhang, L. Estimating Daily Full-Coverage near Surface O<sub>3</sub>, CO, and NO<sub>2</sub> Concentrations at a High Spatial Resolution over China Based on S5P-TROPOMI and GEOS-FP. *ISPRS Journal of Photogrammetry and Remote Sensing* **2021**, *175*, 311–325. <https://doi.org/10.1016/j.isprsjprs.2021.03.018>.
- (3) Lyapustin, A.; Wang, Y. MODIS/Terra+Aqua Land Aerosol Optical Depth Daily L2G Global 1km SIN Grid V061. *NASA EOSDIS Land Processes DAAC* **2022**. <https://doi.org/10.5067/MODIS/MCD19A2.061>.
- (4) Hersbach, H.; Bell, B.; Berrisford, G.; Horányi, A.; Muñoz Sabater, J.; Nicolas, J.; Peubey, C.; Rozum, I.; Schepers, D.; Simmons, A.; Soci, C.; Dee, D.; Thépaut, J.-N. ERA5 Hourly Data on Single Levels from 1959 to Present. *Copernicus Climate Change Service (C3S) Climate Data Store (CDS)* **2023**. <https://doi.org/10.24381/cds.adbb2d47>.
- (5) Kim, M.; Brunner, D.; Kuhlmann, G. Importance of Satellite Observations for High-Resolution Mapping of near-Surface NO<sub>2</sub> by Machine Learning. *Remote Sensing of Environment* **2021**, *264*. <https://doi.org/10.1016/j.rse.2021.112573>.
- (6) Sun, H.; Shin, Y. M.; Xia, M.; Ke, S.; Wan, M.; Yuan, L.; Guo, Y.; Archibald, A. T. Spatial Resolved Surface Ozone with Urban and Rural Differentiation during 1990–2019: A Space–Time Bayesian Neural Network Downscaler. *Environ. Sci. Technol.* **2022**, *56* (11), 7337–7349. <https://doi.org/10.1021/acs.est.1c04797>.
- (7) Ke, G.; Meng, Q.; Finley, T.; Wang, T.; Chen, W.; Ma, W.; Ye, Q.; Liu, T.-Y. LightGBM: A Highly Efficient Gradient Boosting Decision Tree. *Advances in Neural Information Processing Systems 30* **2017**, 3149–3157.
- (8) Zang, Z.; Guo, Y.; Jiang, Y.; Zuo, C.; Li, D.; Shi, W.; Yan, X. Tree-Based Ensemble Deep Learning Model for Spatiotemporal Surface Ozone (O<sub>3</sub>) Prediction and Interpretation. *International Journal of Applied Earth Observation and Geoinformation* **2021**, *103*, 102516. <https://doi.org/10.1016/j.jag.2021.102516>.
- (9) Wei, J.; Li, Z.; Cribb, M.; Huang, W.; Xue, W.; Sun, L.; Guo, J.; Peng, Y.; Li, J.; Lyapustin, A.; Liu, L.; Wu, H.; Song, Y. Improved 1 Km Resolution PM<sub>2.5</sub> Estimates across China Using Enhanced Space–Time Extremely Randomized Trees. *Atmos. Chem. Phys.* **2020**, *20* (6), 3273–3289. <https://doi.org/10.5194/acp-20-3273-2020>.
- (10) Li, M.; Yang, Q.; Yuan, Q.; Zhu, L. Estimation of High Spatial Resolution Ground-Level Ozone Concentrations Based on Landsat 8 TIR Bands with Deep Forest Model. *Chemosphere* **2022**, *301*, 134817. <https://doi.org/10.1016/j.chemosphere.2022.134817>.
- (11) Liu, X.; He, P.; Chen, W.; Gao, J. Multi-Task Deep Neural Networks for Natural Language Understanding. arXiv May 29, 2019. <http://arxiv.org/abs/1901.11504> (accessed 2022-11-22).
- (12) Su, W.; Hu, Q.; Chen, Y.; Lin, J.; Zhang, C.; Liu, C. Inferring Global Surface HCHO Concentrations from Multisource Hyperspectral Satellites and Their Application to HCHO-Related Global Cancer Burden Estimation. *Environment International* **2022**, *170*, 107600. <https://doi.org/10.1016/j.envint.2022.107600>.

- (13) Cooper, M. J.; Martin, R. V.; McLinden, C. A.; Brook, J. R. Inferring Ground-Level Nitrogen Dioxide Concentrations at Fine Spatial Resolution Applied to the TROPOMI Satellite Instrument. *Environ. Res. Lett.* **2020**, *15* (10), 104013. <https://doi.org/10.1088/1748-9326/aba3a5>.
- (14) Inness, A.; Ades, M.; Agustí-Panareda, A.; Barré, J.; Benedictow, A.; Blechschmidt, A.-M.; Dominguez, J. J.; Engelen, R.; Eskes, H.; Flemming, J.; Huijnen, V.; Jones, L.; Kipling, Z.; Massart, S.; Parrington, M.; Peuch, V.-H.; Razinger, M.; Remy, S.; Schulz, M.; Suttie, M. The CAMS Reanalysis of Atmospheric Composition. *Atmos. Chem. Phys.* **2019**, *19* (6), 3515–3556. <https://doi.org/10/ghdkrm>.
- (15) Lyapustin, A.; Wang, Y.; Laszlo, I.; Kahn, R.; Korkin, S.; Remer, L.; Levy, R.; Reid, J. S. Multiangle Implementation of Atmospheric Correction (MAIAC): 2. Aerosol Algorithm. *Journal of Geophysical Research: Atmospheres* **2011**, *116* (D3). <https://doi.org/10.1029/2010JD014986>.
- (16) Hsu, N. C.; Jeong, M.-J.; Bettenhausen, C.; Sayer, A. M.; Hansell, R.; Seftor, C. S.; Huang, J.; Tsay, S.-C. Enhanced Deep Blue Aerosol Retrieval Algorithm: The Second Generation. *Journal of Geophysical Research: Atmospheres* **2013**, *118* (16), 9296–9315. <https://doi.org/10.1002/jgrd.50712>.
- (17) Kaufman, Y. J.; Wald, A. E.; Remer, L. A.; Gao, B.-C.; Li, R.-R.; Flynn, L. The MODIS 2.1- $\mu$ m Channel-Correlation with Visible Reflectance for Use in Remote Sensing of Aerosol. *IEEE Transactions on Geoscience and Remote Sensing* **1997**, *35* (5), 1286–1298. <https://doi.org/10.1109/36.628795>.
- (18) Zhu, Q.; Bi, J.; Liu, X.; Li, S.; Wang, W.; Zhao, Y.; Liu, Y. Satellite-Based Long-Term Spatiotemporal Patterns of Surface Ozone Concentrations in China: 2005–2019. *Environ Health Perspect* **2022**, *130* (2), 027004. <https://doi.org/10.1289/EHP9406>.
- (19) Wei, J.; Li, Z.; Li, K.; Dickerson, R. R.; Pinker, R. T.; Wang, J.; Liu, X.; Sun, L.; Xue, W.; Cribb, M. Full-Coverage Mapping and Spatiotemporal Variations of Ground-Level Ozone (O<sub>3</sub>) Pollution from 2013 to 2020 across China. *Remote Sensing of Environment* **2022**, *270*, 112775. <https://doi.org/10.1016/j.rse.2021.112775>.
- (20) Wang, S.; Mu, X.; Jiang, P.; Huo, Y.; Zhu, L.; Zhu, Z.; Wu, Y. New Deep Learning Model to Estimate Ozone Concentrations Found Worrying Exposure Level over Eastern China. *International Journal of Environmental Research and Public Health* **2022**, *19* (12), 7186. <https://doi.org/10.3390/ijerph19127186>.
- (21) Liu, J. Mapping High Resolution National Daily NO<sub>2</sub> Exposure across Mainland China Using an Ensemble Algorithm. *Environmental Pollution* **2021**, *279*, 116932. <https://doi.org/10.1016/j.envpol.2021.116932>.
- (22) Wu, S.; Huang, B.; Wang, J.; He, L.; Wang, Z.; Yan, Z.; Lao, X.; Zhang, F.; Liu, R.; Du, Z. Spatiotemporal Mapping and Assessment of Daily Ground NO<sub>2</sub> Concentrations in China Using High-Resolution TROPOMI Retrievals. *Environmental Pollution* **2021**, *273*, 116456. <https://doi.org/10.1016/j.envpol.2021.116456>.
- (23) Li, L.; Wu, J. Spatiotemporal Estimation of Satellite-Borne and Ground-Level NO<sub>2</sub> Using Full Residual Deep Networks. *Remote Sensing of Environment* **2021**, *254*, 112257. <https://doi.org/10.1016/j.rse.2020.112257>.
- (24) Wei, J.; Liu, S.; Li, Z.; Liu, C.; Qin, K.; Liu, X.; Pinker, R. T.; Dickerson, R. R.; Lin, J.; Boersma, K. F.; Sun, L.; Li, R.; Xue, W.; Cui, Y.; Zhang, C.; Wang, J. Ground-Level NO<sub>2</sub>

- Surveillance from Space Across China for High Resolution Using Interpretable  
Spatiotemporally Weighted Artificial Intelligence. *Environ. Sci. Technol.* **2022**,  
acs.est.2c03834. <https://doi.org/10.1021/acs.est.2c03834>.
- (25) Yu, W.; Li, S.; Ye, T.; Xu, R.; Song, J.; Guo, Y. Deep Ensemble Machine Learning  
Framework for the Estimation of PM<sub>2.5</sub> Concentrations. *Environ Health Perspect* **2022**, 130  
(3), 037004. <https://doi.org/10.1289/EHP9752>.
- (26) Geng, G.; Xiao, Q.; Liu, S.; Liu, X.; Cheng, J.; Zheng, Y.; Xue, T.; Tong, D.; Zheng, B.; Peng,  
Y.; Huang, X.; He, K.; Zhang, Q. Tracking Air Pollution in China: Near Real-Time PM<sub>2.5</sub>  
Retrievals from Multisource Data Fusion. *Environ. Sci. Technol.* **2021**, 55 (17), 12106–12115.  
<https://doi.org/10.1021/acs.est.1c01863>.
- (27) Huang, C.; Hu, J.; Xue, T.; Xu, H.; Wang, M. High-Resolution Spatiotemporal Modeling for  
Ambient PM<sub>2.5</sub> Exposure Assessment in China from 2013 to 2019. *Environ. Sci. Technol.*  
**2021**, 55 (3), 2152–2162. <https://doi.org/10.1021/acs.est.0c05815>.
